# Supplementary material for: Long-term stress conditions and out-of-hospital cardiac arrest risk: a nested case–control study
Source: HighWire-hosted journal article supplement (doi:10.1136/openhrt-2022-002223), 2023-05-01
Supplement: openhrt-2022-002223supp001_data_supplement.pdf [file openhrt-2022-002223supp001_data_supplement.pdf]

# Supplementary material

**Supplementary Table 1. ICD-10 codes, procedure and ATC codes used throughout the study**

| <b>Disease</b>                      | <b>ICD-10 codes</b>                                                | <b>Procedure codes</b>                              | <b>ATC codes</b>                                                                                                                                                                                                                      |
|-------------------------------------|--------------------------------------------------------------------|-----------------------------------------------------|---------------------------------------------------------------------------------------------------------------------------------------------------------------------------------------------------------------------------------------|
| Long-term stress                    | F43.1 Post-traumatic stress disorder<br>F43.2 Adjustment disorders |                                                     |                                                                                                                                                                                                                                       |
| Anxiety                             | F40, F41                                                           |                                                     |                                                                                                                                                                                                                                       |
| Heart failure                       | I50, I110, I130, I132, I420, I426-<br>I429, I421, I422, I425       |                                                     |                                                                                                                                                                                                                                       |
| Ischemic heart disease†             | I20-I25                                                            | KFNA, KFNB, KFNC, KFND,<br>KFNE, KFNG, KFNF, KFNH20 |                                                                                                                                                                                                                                       |
| Cerebrovascular disease             | I60-I69, G45-G46                                                   |                                                     |                                                                                                                                                                                                                                       |
| Atrial fibrillation                 | I48                                                                |                                                     |                                                                                                                                                                                                                                       |
| Peripheral artery disease           | I70-I74, I77                                                       |                                                     |                                                                                                                                                                                                                                       |
| Diabetes mellitus                   |                                                                    |                                                     | A10                                                                                                                                                                                                                                   |
| Depression                          | F32, F33                                                           |                                                     |                                                                                                                                                                                                                                       |
| <b>Concomitant pharmacotherapy</b>  |                                                                    |                                                     |                                                                                                                                                                                                                                       |
| Renin-angiotensin system inhibitors |                                                                    |                                                     | C09A, C09B, C09C, C09D                                                                                                                                                                                                                |
| Beta blockers                       |                                                                    |                                                     | C07                                                                                                                                                                                                                                   |
| Diuretics                           |                                                                    |                                                     | C03AA, C03AB, C03B, C03C, C03D, C03E,<br>C07B, C07CA, C07CB, C07D, C08G, C09BA,<br>C09DA                                                                                                                                              |
| Calcium channel blockers            |                                                                    |                                                     | C08                                                                                                                                                                                                                                   |
| Nitrates                            |                                                                    |                                                     | C01DA                                                                                                                                                                                                                                 |
| Antiarrhythmic drugs class 1 or 3   |                                                                    |                                                     | C01B                                                                                                                                                                                                                                  |
| Antithrombotics                     |                                                                    |                                                     | B01AA, B01AC, B01AE07, B01AF01, B01AF02,<br>B01AF03                                                                                                                                                                                   |
| Anxiolytics                         | N05B                                                               |                                                     |                                                                                                                                                                                                                                       |
| Antidepressants                     | N06A                                                               |                                                     |                                                                                                                                                                                                                                       |
| QT-prolonging drugs††               |                                                                    |                                                     | J01FA06, J01FA10, J01MA02, J01FA09,<br>J01FA01, J01MA14, J02AC01, N05AA02,<br>N05AL01, C07AA07, C01BA01, N05AG02,<br>A04AA01, N05AD01, C01BC04, N06AB10,<br>C01BD07, N06DA02, A03FA03, N06AB04,<br>N05AD08, N05AA01, N05AF03, C01BD01 |

---

† Including acute myocardial infarction

†† QT-prolonging drugs with known risk of Torsade de Pointes according to CredibleMeds website ([www.CredibleMeds.org](http://www.CredibleMeds.org)).

---

| <b>Table 2. Hazard ratio of out-of-hospital cardiac arrest (OHCA) associated with long-term stress conditions and/or anxiety</b>                                                                                         |                             |                                 |                              |                                 |
|--------------------------------------------------------------------------------------------------------------------------------------------------------------------------------------------------------------------------|-----------------------------|---------------------------------|------------------------------|---------------------------------|
|                                                                                                                                                                                                                          | <b>Cases<br/>(n=35.195)</b> | <b>Controls<br/>(n=351.950)</b> | <b>Crude HR<br/>(95% CI)</b> | <b>Adjusted HR<br/>(95% CI)</b> |
| Neither of the two diagnoses                                                                                                                                                                                             | 34.531 (98.11%)             | 348.937 (99.14%)                | reference                    | reference                       |
| Long-term stress                                                                                                                                                                                                         | 324 (0.92%)                 | 1.577 (0.45%)                   | 2.08 (1.85-2.35)             | 1.44 (1.27-1.64)                |
| Post-traumatic stress disorder                                                                                                                                                                                           | 24 (0.07%)                  | 107 (0.03%)                     | 2.28 (1.46-3.56)             | 1.80 (1.13-2.86)                |
| Adjustment disorders                                                                                                                                                                                                     | 295 (0.84%)                 | 1.447 (0.41%)                   | 2.07 (1.82-2.35)             | 1.42 (1.24-1.63)                |
| Post-traumatic stress disorder<br>and adjustment disorders                                                                                                                                                               | ≤ 5 (0.01%)                 | 23 (0.01%)                      | NA                           | NA                              |
| Anxiety                                                                                                                                                                                                                  | 299 (0.85 %)                | 1.298 (0.37%)                   | 2.34 (2.06 -2.65)            | 1.56 (1.37-1.79)                |
| Both diagnoses                                                                                                                                                                                                           | 41 (0.12%)                  | 138 (0.04%)                     | 3.03 (2.14-4.30)             | 2.00 (1.38-2.89)                |
| Abbreviations: CI, confidence interval; HR, hazard ratio. Numbers in table are number (%) unless indicated otherwise. HR adjusted for presence of cardiovascular disease, depression and the use of QT-prolonging drugs. |                             |                                 |                              |                                 |

|                                                                                                        | <b>Neither of the two diagnoses<br/>(n=34.531)</b> | <b>Long-term stress<br/>(n=324)</b> | <b>Anxiety<br/>(n=299)</b> |
|--------------------------------------------------------------------------------------------------------|----------------------------------------------------|-------------------------------------|----------------------------|
| Age (years), median [IQR]                                                                              | 72 [62.81]                                         | 59 [49,71]                          | 68 [56.5,76.5]             |
| Male sex, n (%)                                                                                        | 23.188 (67.15)                                     | 183 (56.48)                         | 131 (43.81)                |
| <b>Comorbidity, n (%)</b>                                                                              |                                                    |                                     |                            |
| Heart failure                                                                                          | 6.993 (20.25)                                      | 72 (22.22)                          | 63 (21.07)                 |
| Ischemic heart disease <sup>§</sup>                                                                    | 9.145 (26.48)                                      | 79 (24.38)                          | 83 (27.76)                 |
| Cerebrovascular disease                                                                                | 4.803 (13.91)                                      | 44 (13.58)                          | 59 (19.73)                 |
| Atrial fibrillation                                                                                    | 6.010 (17.40)                                      | 38 (11.73)                          | 50 (16.72)                 |
| Peripheral artery disease                                                                              | 3.828 (11.09)                                      | 37 (11.42)                          | 46 (15.38)                 |
| Diabetes mellitus                                                                                      | 5.228 (15.14)                                      | 54 (16.67)                          | 41 (13.71)                 |
| Depression                                                                                             | 1.578 (4.57)                                       | 133 (41.05)                         | 111 (37.12)                |
| <b>Concomitant pharmacotherapy, n (%)</b>                                                              |                                                    |                                     |                            |
| Renin-angiotensin system inhibitors                                                                    | 12.904 (37.37)                                     | 104 (32.10)                         | 86 (28.76)                 |
| Beta blockers                                                                                          | 8.430 (24.41)                                      | 54 (16.67)                          | 79 (26.42)                 |
| Diuretics                                                                                              | 17.217 (49.86)                                     | 134 (41.36)                         | 150 (50.17)                |
| Calcium channel blockers                                                                               | 6.849 (19.83)                                      | 64 (19.75)                          | 60 (20.07)                 |
| Nitrates                                                                                               | 3.900 (11.29)                                      | 32 (9.88)                           | 27 (9.03)                  |
| Antiarrhythmic drugs class 1 or 3                                                                      | 662 (1.92)                                         | 4 (1.12)                            | 8 (2.68)                   |
| Antithrombotics                                                                                        | 15.813 (45.79)                                     | 126 (38.89)                         | 125 (41.81)                |
| Anxiolytics                                                                                            | 3.933 (11.39)                                      | 109 (33.64)                         | 139 (46.49)                |
| Antidepressants                                                                                        | 6.034 (17.47)                                      | 178 (54.94)                         | 191 (63.88)                |
| QT-prolonging drugs                                                                                    | 5.598 (16.21)                                      | 115 (35.49)                         | 123 (41.14)                |
| Abbreviation: OHCA, out-of-hospital cardiac arrest. Numbers are number (%) unless indicated otherwise. |                                                    |                                     |                            |
| §including acute myocardial infarction                                                                 |                                                    |                                     |                            |

**Table 4. Hazard ratio of out-of-hospital cardiac arrest (OHCA) in patients with long-term stress conditions or anxiety: stratification according to ischemic heart disease**

|                                                                                                                                                                                                                                                                                                                                                                                                                     | <b>Cases<br/>(n=35.195)</b> | <b>Controls<br/>(n=351.950)</b> | <b>Crude HR<br/>(95% CI)</b> | <b>Adjusted HR<br/>(95% CI)</b> |
|---------------------------------------------------------------------------------------------------------------------------------------------------------------------------------------------------------------------------------------------------------------------------------------------------------------------------------------------------------------------------------------------------------------------|-----------------------------|---------------------------------|------------------------------|---------------------------------|
| <b>Present</b>                                                                                                                                                                                                                                                                                                                                                                                                      | 9.316                       | 41.992                          |                              |                                 |
| Neither of the two diagnoses                                                                                                                                                                                                                                                                                                                                                                                        | 9.145 (98.16%)              | 41.479 (98.78)                  | reference                    | reference                       |
| Long-term stress                                                                                                                                                                                                                                                                                                                                                                                                    | 79 (0.85 %)                 | 232 (0.55%)                     | 1.55 (1.20-2.00)             | 1.02 (0.77-1.34)                |
| Anxiety                                                                                                                                                                                                                                                                                                                                                                                                             | 83 (0.89 %)                 | 262 (0.62%)                     | 1.44 (1.12-1.84)             | 1.11 (0.85-1.44)                |
| Both diagnoses                                                                                                                                                                                                                                                                                                                                                                                                      | 9 (0.10%)                   | 19 (0.05%)                      | 2.16 (0.98-4.77)             | 1.60 (0.70-3.70)                |
|                                                                                                                                                                                                                                                                                                                                                                                                                     |                             |                                 |                              |                                 |
| <b>Absent</b>                                                                                                                                                                                                                                                                                                                                                                                                       | 25.879                      | 309.958                         |                              |                                 |
| Neither of the two diagnoses                                                                                                                                                                                                                                                                                                                                                                                        | 25.386 (98.09%)             | 307.458 (99.19%)                | reference                    | reference                       |
| Long-term stress                                                                                                                                                                                                                                                                                                                                                                                                    | 245 (0.95 %)                | 1.345 (0.43%)                   | 2.21 (1.93-2.53)             | 1.56 (1.35-1.80)                |
| Anxiety                                                                                                                                                                                                                                                                                                                                                                                                             | 216 (0.83 %)                | 1.036 (0.33%)                   | 2.53 (2.18-2.93)             | 1.77 (1.52-2.06)                |
| Both diagnoses                                                                                                                                                                                                                                                                                                                                                                                                      | 32 (0.12%)                  | 119 (0.04%)                     | 3.27 (2.21-4.82)             | 1.97 (1.31-2.97)                |
| Abbreviations: CI, confidence interval; HR, hazard ratio. Numbers in table are number (%) unless indicated otherwise. HR adjusted for presence of cardiovascular disease, depression and the use of QT-prolonging drugs. Furthermore, by conducting stratified analyses according ischemic heart disease, the original matching on age and sex was lost. Therefore, HRs were additionally adjusted for age and sex. |                             |                                 |                              |                                 |
| P-value interaction: long-term stress=0.4243, anxiety=0.1581, both diagnoses=0.7474                                                                                                                                                                                                                                                                                                                                 |                             |                                 |                              |                                 |

**Table 5. Hazard ratio of out-of-hospital cardiac arrest (OHCA) in patients with long-term stress conditions or anxiety: stratification according to heart failure**

|                                                                                                                                                                                                                                                                                                                                                                                                            | Cases<br>(n=35.195) | Controls<br>(n=351.950) | Crude HR<br>(95% CI) | Adjusted HR<br>(95% CI) |
|------------------------------------------------------------------------------------------------------------------------------------------------------------------------------------------------------------------------------------------------------------------------------------------------------------------------------------------------------------------------------------------------------------|---------------------|-------------------------|----------------------|-------------------------|
| <b>Present</b>                                                                                                                                                                                                                                                                                                                                                                                             | 7.136               | 17.285                  |                      |                         |
| Neither of the two diagnoses                                                                                                                                                                                                                                                                                                                                                                               | 6.993 (98.00%)      | 17.087 (98.85)          | reference            | reference               |
| Long-term stress                                                                                                                                                                                                                                                                                                                                                                                           | 72 (1.01%)          | 90 (0.52%)              | 1.96 (1.43-2.67)     | 1.24 (0.89 -1.73)       |
| Anxiety                                                                                                                                                                                                                                                                                                                                                                                                    | 63 (0.88 %)         | 103 (0.60%)             | 1.50 (1.09 -2.05)    | 1.13 (0.81 -1.57)       |
| Both diagnoses                                                                                                                                                                                                                                                                                                                                                                                             | 8 (0.11%)           | 5 (0.03%)               | 3.88 (1.27 -11.87)   | 2.20 (0.70 -6.98)       |
|                                                                                                                                                                                                                                                                                                                                                                                                            |                     |                         |                      |                         |
| <b>Absent</b>                                                                                                                                                                                                                                                                                                                                                                                              | 28.059              | 334.665                 |                      |                         |
| Neither of the two diagnoses                                                                                                                                                                                                                                                                                                                                                                               | 27.538 (98.14%)     | 331.850 (99.16)         | reference            | reference               |
| Long-term stress                                                                                                                                                                                                                                                                                                                                                                                           | 252 (0.90 %)        | 1.487 (0.44%)           | 2.04 (1.79-2.34)     | 1.45 (1.26 -1.66)       |
| Anxiety                                                                                                                                                                                                                                                                                                                                                                                                    | 236 (0.84 %)        | 1.195 (0.36%)           | 2.38 (2.07 -2.74)    | 1.65 (1.43 -1.91)       |
| Both diagnoses                                                                                                                                                                                                                                                                                                                                                                                             | 33 (0.12%)          | 133 (0.04%)             | 3.00 (2.05 -4.39)    | 1.86 (1.26 -2.74)       |
| Abbreviations: CI, confidence interval; HR, hazard ratio. Numbers in table are number (%) unless indicated otherwise. HR adjusted for presence of cardiovascular disease, depression and the use of QT-prolonging drugs. Furthermore, by conducting stratified analyses according heart failure, the original matching on age and sex was lost. Therefore, HRs were additionally adjusted for age and sex. |                     |                         |                      |                         |
| P-value interaction: long-term stress=0.9962, anxiety=0.0916, both diagnoses=0.5394                                                                                                                                                                                                                                                                                                                        |                     |                         |                      |                         |

**Supplementary Table 6: Hazard ratio of out-of-hospital cardiac arrest (OHCA) in patients with long-term stress conditions or anxiety as compared with patients with neither of the two diagnoses in individuals with the absence of cardiovascular disease, depression, use of cardiovascular drugs, QT-prolonging drugs and antidepressants**

|                              | <b>Cases<br/>(n=7.491)</b> | <b>Controls<br/>(n=145.893)</b> | <b>Crude HR<br/>(95% CI)</b> | <b>Adjusted HR<br/>(95% CI)</b> |
|------------------------------|----------------------------|---------------------------------|------------------------------|---------------------------------|
| Neither of the two diagnoses | 7.418 (99.03%)             | 145.359 (99.63%)                | reference                    | reference                       |
| Long-term stress             | 44 (0.59%)                 | 353 (0.24%)                     | 2.44 (1.78-3.34)             | 2.25 (1.64-3.08)                |
| Anxiety                      | 24 (0.32%)                 | 162 (0.11%)                     | 2.90 (1.98-4.46)             | 2.77 (1.80-4.23)                |
| Both diagnoses               | ≤ 5 (0.07%)                | 19 (0.01%)                      | NA                           | NA                              |

Abbreviations: CI, confidence interval; HR, hazard ratio. Numbers in table are number (%) unless indicated otherwise. HR adjusted for age and sex.
